# Supplementary material for: Subjective Oral Health-Related Quality of Life and Objective Oral Health in People with Ectodermal Dysplasia
Source: MDPI journal article supplement (doi:10.3390/ijerph18010143), 2020-12-28
Supplement: s1 [file s1]

## PhOX Examination-sheet [Version 1.1]

### A Self-declarations

How often have you encountered any of the following sensations in your mouth, jaw and face area in the past 30 days:

Pain:            never  
                 rarely (ca. 1x per month)  
                 now and then (multiple per month)  
                 often (multiple per week)  
                 very often (daily)

Paresthesia: (burning, numbness, hypersensitivity, change in taste, etc.)

                 never  
                 rarely (ca. 1x per month)  
                 now and then (multiple per month)  
                 often (multiple per week)  
                 very often (daily)

### B Extraoral report

Pain on palpation (M. temporalis, M. masseter, mandibular joint, Gl. parotis, Gl. submandibularis)

| No | Yes                 |
|----|---------------------|
|    | Intensity: light    |
|    | moderate            |
|    | intense             |
|    | prominence: unknown |
|    | known               |

### C Intraoral report

Number of healthy teeth

Number of filled, crowned teeth (including implant-supported crowns)

Number of decayed teeth

Number of teeth overall (including space closure)

Number of teeth with probing-depth 3,5-5,5mm

Number of teeth with probing-depth >5,5mm

Bleeding on probing: no / yes

Number of teeth with percussion sensibility

Number of supporting zones [0-4]

Overjet (sagittal overbite)

Overbite (vertical overbite)

Maximum contact-point deviation

Lateral crossbite

Mouth opening (with dentures): straight / not straight

Maximum active mouth opening

Maximum passive mouth opening

**Clefts or defects:** none

Operated cleft or defect

Only in soft-tissues

Bone-defect without mouth-antrum-connection

Bone-defect with mouth-antrum-connection

**Humidity:** wet

partial dry

completely dry

**Saliva-texture:** fluid

slight foamy

no saliva

**Swelling:** (oral mucosa/lips/tongue)

No

Yes

Area: Max.  $\frac{1}{4}$  of the surface

Max.  $\frac{1}{2}$  of the surface

More than  $\frac{1}{2}$  of the surface

Whole surface

Intensity: light

intense

**Color alteration:** (oral mucosa/lips/tongue)

No

Yes

Area: Max.  $\frac{1}{4}$  of the surface

Max.  $\frac{1}{2}$  of the surface

More than  $\frac{1}{2}$  of the surface

Whole surface

Intensity: light

intense

**Loss of integrity:** (oral mucosa/lips/tongue)

No

Yes

Area: Max.  $\frac{1}{4}$  of the surface

Max.  $\frac{1}{2}$  of the surface

More than  $\frac{1}{2}$  of the surface

Whole surface

Intensity: light

intense
